# Supplementary material for: Effect of gait speed on post-stroke step length and anterior ground reaction force relative to individualized predicted values
Source: Research Square preprint supplement (doi:10.21203/rs.3.rs-6506637/v1), 2025-05-30
Supplement: Supplementary file 1 [file 8412c8934589f9d9b6067b83.pdf]

## **SUPPLEMENTAL METHODS**

### **Dataset one inclusion/exclusion criteria**

Participants were included if they were at least eighteen years of age, had a stroke diagnosis, and were able to walk independently with or without an assistive device. Participants were excluded if they had orthopedic or musculoskeletal conditions, cerebellar disease or disorder, congestive heart failure, peripheral artery disease, pulmonary failure, a history of myocardial infarction or cardiac dysfunction within the last three months, uncontrolled hypertension, dementia, or renal failure.

### **Dataset two inclusion/exclusion criteria**

Participants were included if they were aged eighteen to eighty years, at least six months post-stroke, able to walk independently for at least five minutes, and had paresis confined to one side. Participants were excluded if they had damage to the pons, basal ganglia, or cerebellum, signs of cerebellar involvement or extrapyramidal symptoms, uncontrolled hypertension, a Montreal Cognitive Assessment five-minute protocol score less than nineteen, or orthopedic or pain conditions that affected walking ability.

## **SUPPLEMENTAL RESULTS**

Twenty-three participants were excluded from the step length analysis, and twenty-two participants were excluded from the AGRF analysis. The detailed reasons for exclusion are defined in Supplemental Table 1.

**Supplemental Table 1.** Detailed reasons for participant exclusion.

| ID | Trials excluded               | Reason for exclusion                                                                                                        |
|----|-------------------------------|-----------------------------------------------------------------------------------------------------------------------------|
| 1  | All                           | Marker occlusion                                                                                                            |
| 2  | All                           | Missing mass                                                                                                                |
| 3  | All                           | Speed $\leq 0.36$ m/s at all speeds                                                                                         |
| 4  | All                           | Missing mass                                                                                                                |
| 6  | All                           | Hip marker occlusion (unable to calculate leg length)                                                                       |
| 7  | Step length slow              | Step length $\leq 0.32$ m at slow speed                                                                                     |
| 8  | AGRF slow<br>Step length slow | Marker occlusion at slow speed                                                                                              |
| 11 | Step length slow              | Step length $\leq 0.32$ m at slow speed                                                                                     |
| 12 | AGRF slow<br>Step length slow | Speed $\leq 0.36$ m/s at slow speed                                                                                         |
| 13 | Step length slow              | Step length $\leq 0.32$ m at slow speed                                                                                     |
| 14 | AGRF slow<br>Step length slow | Speed $\leq 0.36$ m/s at slow speed                                                                                         |
| 15 | All                           | Speed $\leq 0.36$ m/s at all speeds                                                                                         |
| 16 | All                           | Speed $\leq 0.36$ m/s at all speeds                                                                                         |
| 17 | AGRF fast<br>Step length fast | < 120 seconds of data collected at fast speed                                                                               |
| 18 | AGRF fast<br>All step length  | Step length $\leq 0.32$ m at slow speed and no fast speed collected                                                         |
| 19 | Step length slow              | Step length $\leq 0.32$ m at slow speed                                                                                     |
| 20 | All                           | Missing mass                                                                                                                |
| 21 | All                           | Did not report paretic limb                                                                                                 |
| 22 | All                           | Speed $\leq 0.36$ m/s at self-selected speed and no fast speed collected                                                    |
| 23 | All                           | Data collection error                                                                                                       |
| 24 | All                           | Did not report paretic limb                                                                                                 |
| 25 | Step length slow              | Step length $\leq 0.32$ m at slow speed                                                                                     |
| 26 | AGRF slow<br>Step length slow | Speed $\leq 0.36$ m/s at slow speed                                                                                         |
| 28 | All                           | Did not report paretic limb                                                                                                 |
| 29 | Step length slow              | Step length $\leq 0.32$ m at slow speed                                                                                     |
| 30 | All                           | Did not report paretic limb                                                                                                 |
| 31 | AGRF slow<br>Step length slow | Speed $\leq 0.36$ m/s at slow speed and step length $\leq 0.32$ m at slow speed                                             |
| 32 | AGRF fast<br>Step length fast | No fast speed collected                                                                                                     |
| 33 | All                           | Speed $\leq 0.36$ m/s for slow and self-selected speeds                                                                     |
| 34 | AGRF slow                     | AGRF $\leq 18.2$ N at slow speed                                                                                            |
| 35 | All AGRF                      | AGRF $\leq 18.2$ N at all speeds                                                                                            |
| 36 | All                           | Speed $\leq 0.36$ m/s at slow speed, SL $\leq 0.32$ m at all speeds, and AGRF $\leq 18.2$ at self-selected speed            |
| 37 | All                           | Speed $\leq 0.36$ m/s for slow and self-selected speeds                                                                     |
| 38 | AGRF slow                     | AGRF $\leq 18.2$ N at slow speed                                                                                            |
| 39 | All AGRF                      | AGRF $\leq 18.2$ N at all speeds                                                                                            |
| 40 | All                           | Speed $\leq 0.36$ m/s at all speeds                                                                                         |
| 41 | All step length<br>AGRF slow  | Step length $\leq 0.32$ m at slow and self-selected speeds,<br>AGRF $\leq 18.2$ N at slow speed                             |
| 42 | All AGRF<br>Step length slow  | Speed $\leq 0.36$ m/s at slow speed, AGRF $\leq 18.2$ N at self-selected                                                    |
| 46 | All step length               | Step length $\leq 0.32$ m all speeds                                                                                        |
| 47 | AGRF slow                     | AGRF $\leq 18.2$ N at slow speed                                                                                            |
| 48 | AGRF slow<br>Step length slow | Speed $\leq 0.36$ m/s at slow speed                                                                                         |
| 49 | All                           | Speed $\leq 0.36$ m/s at slow speed, step length $\leq 0.32$ m at self-selected speed, and AGRF $\leq 18.2$ N at all speeds |
| 51 | Step length slow              | Step length $\leq 0.32$ m at slow speed                                                                                     |
| 52 | Step length slow              | Step length $\leq 0.32$ m at slow speed                                                                                     |
| 53 | All step length               | Marker occlusion                                                                                                            |

Abbreviation: AGRF, anterior ground reaction force.
